# Supplementary material
Source: PubMed Central journal article supplement (PMC5709176)
Supplement: NIHMS881060-supplement-sup.pdf [file NIHMS881060-supplement-sup.pdf]

**ESM Table 1** Sequence of primers of mouse genes used in Real-time PCR analysis

| <b>Primer</b> | <b>Forward Sequence (5'-3')</b> | <b>Reverse Sequence (5'-3')</b> |
|---------------|---------------------------------|---------------------------------|
| <i>mCcl</i>   | AATCTGCCCTGGCGCTTGGAGCC         | AAATCGCACAGTCGCCTGAGTACG        |
| <i>Ucp3</i>   | GTCTGCCTCATCAGGGTGT             | CCTGGTCCTTACCATGCAGT            |
| <i>Cpt1b</i>  | AAGGCAGAAGAGTGGGCTTTCACT        | ACCTTGGCTGCGGTAAGACTATGT        |
| <i>Pdk4</i>   | CCTTTGGCTGGTTTTGGTTA            | CCTGCTTGGGATAACACCAGT           |
| <i>Cox2</i>   | ACGAAATCAACAACCCCGTA            | GGCAGAACGACTCGGTTATC            |
| <i>Ppara</i>  | TCACAAGTGCCTGTCTGTCG            | CAGGTAGGCTTCGTGGATTC            |
| <i>Cpt1</i>   | AAGGCAGAAGAGTGGGCTTTCACT        | ACCTTGGCTGCGGTAAGACTATGT        |
| <i>Cd36</i>   | TCTTGGCTACAGCAAGGCGACATA        | AGCTATGCAGCATGGAACATGACG        |
| <i>Ucp1</i>   | GGGCCCTTGTAACAACAAA             | GTCGGTCCTTCCTTGGTGTA            |
| <i>Dio2</i>   | AAATGACCCCTTTGGTTTCC            | TTCCCCATTAT CC TTTCC            |
| <i>G6Pase</i> | TCCTGGGACAGACACACAAG            | CAACTTTAATATACGCTATTGG          |
| <i>Pepck</i>  | CTTCTCTGCCAAGGTCATCC            | TTTTGGGGATGGGCAC                |
| <i>Fasn</i>   | ACTGTGAGAAGCATGTCCCTGGAA        | AAGCAACCTCCACTCCTCTGCTTA        |
| <i>Fatp1</i>  | GCAGAAGACGCAGGAAGA              | GGACGTGGCTGTGTATGG              |
| <i>Adrb3</i>  | GGCACAGGAATGCCACTCCAAT          | AGGAGGGGAAGGTAGAAGGAGAC         |
| <i>Adrb2</i>  | ACGAAGCGTGGGTTGTGGGC            | CCCAAACGGCACCACCGCTA            |
| <i>Gapdh</i>  | CCAGGTTGTCTCCTGCGACT            | ATACCAGGAAATGAGCTTGACAAAGT      |

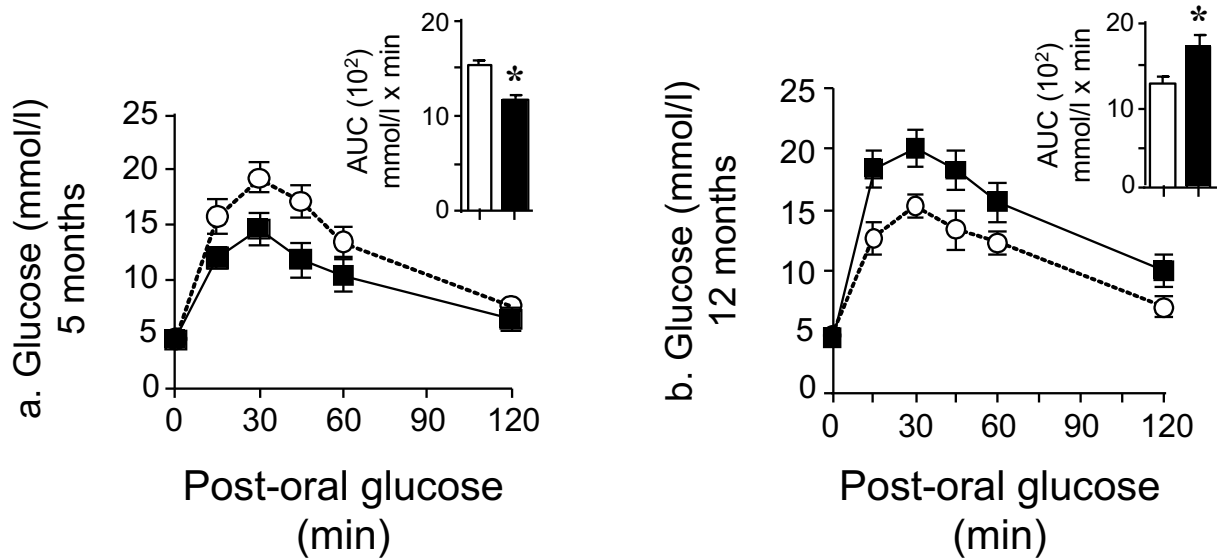

**ESM Fig. 1**

Male mice (5 to 12 months of age,  $n \geq 5$  for each genotype and age group) were subjected to an oral gavage of glucose (3 g/kg body weight) to assess blood glucose levels at 0-120 min post-injection. Area under the curve (AUC) was measured and represented as a bar graph.

Values are expressed as means  $\pm$  SEM.

\* $P < 0.05$  in  $Cc2^{-/-}$  (black bars or squares) vs  $Cc2^{+/+}$  mice (white bars or circles).
